# Supplementary material for: Responses of nitrogen efficiency and antioxidant system of summer maize to waterlogging stress under different tillage
Source: PeerJ. 2021 Jul 26;9:e11834. doi: 10.7717/peerj.11834 (PMC8320525; doi:10.7717/peerj.11834)
Supplement: Supplemental Information 1 [file peerj-09-11834-s001.xls]

## Sheet: Table2
	Year	Hybrid	Treatment	Grain yield	Nitrogen translocation amount, NTA	Nitrogen translocation efficiency, (NTE, %)	Nitrogen contribution proportion, (NCP, %)	Nitrogen harvest index, (NHI)	Nitrogen use efficiency, (NUE, %)
				(Kg/ha)	(g/plant)
	2014	DH605	W-V3	9310 c	0.22 c	14.97 c	13.50 c	0.57 b	47.89 c
			W-V3+R	11495 b	0.59 b	32.24 b	27.44 b	0.63 a	50.23 b
			CK	14336 a	1.29 a	50.00 a	51.39 a	0.66 a	55.89 a
		ZD958	W-V3	8093 c	0.20 c	15.27 b	13.25 c	0.58 b	45.76 b
			W-V3+R	11306 b	0.96 b	46.38 a	46.83 b	0.65 a	53.01 a
			CK	13916 a	1.31 a	48.16 a	50.58 a	0.65 a	51.54 a
	2015	DH605	W-V3	8311 c	0.29 c	16.33 c	18.28 c	0.52 b	40.24 b
			W-V3+R	12646 b	0.43 b	20.18 b	21.51 b	0.54 b	51.01 a
			CK	14175 a	0.92 a	37.96 a	38.18 a	0.62 a	53.44 a
		ZD958	W-V3	8137 c	0.30 b	20.81 c	22.16 c	0.54 c	48.81 b
			W-V3+R	13107 b	0.64 b	33.14 b	30.57 b	0.62 b	57.01 a
			CK	14164 a	1.13 a	47.66 a	47.51 a	0.66 a	58.19 a

## Sheet: Fig.1
SOD-DH605	V3-6	SD	V3-6-R	SD	CK	SD
V6	234.683	9.02	269.57	10.12	370.75	11.23
V12	205.495	8.222	247.024	11.1123	274.46	10.22
VT	236.46	7.7829	269.822	9.8251	321.35	8.65
R3	413.647	9.3338	466.859	10.2014	614.12	10.668
R6	367.23	10.5077	417.494	10.6281	524.387	9.68
SOD-ZD958	V3-6		V3-6-R		CK
V6	236.995	15.32	321.478	15.22	415.91	16.21
V12	193.96	13.33	227.95	14.2235	307.96	13.1123
VT	259.62	16.8434	320.13	9.994	344.39	15.8251
R3	402.421	9.5657	480.398	15.2397	641.123	10.2014
R6	362.341	10.4845	413.301	10.5945	469.118	17.6281
POD-DH605	V3-6		V3-6-R		CK
V6	50	10.95	60.8378	11.24	66.868	11.22
V12	77.2929	11.52	102.269	12.12	107.143	12.11
VT	102.794	13.42	129.407	15	140.672	12.92
R3	205.257	16.12	240.256	13.46	251.534	15.1
R6	169.548	15.24	208.603	14.56	226.036	13.51
POD-ZD958	V3-6		V3-6-R		CK
V6	25.4498	11.05	31.4852	11.21	37.1397	11.11
V12	27.8174	12.33	39.7719	12.18	47.6935	12.01
VT	62.3	12.56	89.4705	12.92	96.2237	14.25
R3	159.449	14.35	182.166	15.1	199.07	13.55
R6	140.306	15.25	163.54	13.51	171.813	14.32
CAT-DH605	V3-6		V3-6-R		CK
V6	4.78	0.55	6.04	0.65	7.67	0.32
V12	5.25	0.22	7.71	0.15	9.68	0.23
VT	6.5476	0.292	8.9349	0.34	11.2205	0.26
R3	4.7141	0.51	5.629	0.61	6.3825	0.44
R6	3.55	0.35	4.13	0.52	5.3441	0.53
CAT-ZD958	V3-6		V3-6-R		CK
V6	4.19	0.36	5.94	0.25	6.5	0.44
V12	5.75	0.2	7.71	0.21	8.8008	0.35
VT	7.2988	0.31	9.0105	0.4	10.0346	0.26
R3	4.1356	0.45	6.08	0.45	6.58	0.34
R6	2.876	0.38	4.2952	0.22	5.6385	0.22

## Sheet: Fig.2
MDA-DH605	V3-6	SD	V3-6-R	SD	CK	SD
V6	32.1009	1.62	26.6612	1.06	22.4512	1.01
V12	37.9679	1.52	27.9451	1.11	24.88	1.11
VT	41.2779	2.2	36.2015	2.2	33.3577	1.56
R3	52.9782	1.98	41.0178	1.55	37.4572	1.35
R6	57.3549	1.24	52.5417	1.9	45.7651	2.2
MDA-ZD958	V3-6		V3-6-R		CK
V6	35.0387	1.21	27.4397	2.22	23.8325	1.33
V12	36.1724	1.12	28.6582	1.98	25.0356	1.9
VT	40.5518	1.89	36.2809	1.46	30.2827	1.25
R3	48.6624	1.66	42.9603	1.35	34.2476	1.15
R6	50.4045	1.56	45.3953	2.2	40.8032	2.1

## Sheet: Fig.3
2014-DH605		SD		SD		SD
V6	0.0361	0.087	0.06	0.068	0.0148	0.1
V12	0.77	0.2	0.82	0.11	1.3098	0.11
VT	1.4724	0.0897	1.83	0.0985	2.081	0.19
R3	1.7696	0.15	2.64	0.15	2.7238	0.09
R6	2.8827	0.0986	3.38	0.18	3.796	0.0922
2014-ZD958
V6	0.0442	0.089	0.06	0.078	0.1086	0.05
V12	0.77	0.15	0.84	0.16	1.648	0.19
VT	1.3068	0.0985	2.07	0.0897	2.3191	0.091
R3	1.7193	0.16	2.63	0.15	3.0262	0.11
R6	2.6225	0.09	3.16	0.0986	4.001	0.0992
2015-DH605
V6	0.047	0.068	0.0525	0.087	0.1873	0.078
V12	0.2033	0.16	0.6696	0.0822	1.4674	0.17
VT	1.7689	0.0985	2.1153	0.15	2.4339	0.0897
R3	2.4843	0.18	2.9449	0.0985	3.287	0.18
R6	3.06	0.09	3.6724	0.16	3.93	0.0986
2015-ZD958
V6	0.0224	0.1	0.0742	0.05	0.1188	0.078
V12	0.1622	0.18	0.4175	0.15	0.9232	0.16
VT	1.4267	0.19	1.9433	0.05	2.3622	0.0897
R3	2.0774	0.09	3.0404	0.18	3.2315	0.18
R6	2.4698	0.15	3.406	0.0992	3.6063	0.21

## Sheet: Fig.4
2014	Hybrid	Treatment	Leaf	Stem	Cob	Grain
	DH605	W-V3	0.73	0.34	0.18	1.63
		W-V3+R	0.66	0.41	0.17	2.15
		CK	0.68	0.42	0.19	2.51
			Leaf	Stem	Cob	Grain
	ZD958	W-V3	0.61	0.4	0.1	1.51
		W-V3+R	0.54	0.48	0.09	2.05
		CK	0.73	0.58	0.1	2.59
2015	Hybrid	Treatment	Leaf	Stem	Cob	Grain
	DH605	W-V3	0.72	0.43	0.33	1.58
		W-V3+R	0.755893	0.42584	0.506703	1.98398
		CK	0.78	0.5	0.23	2.42
			Leaf	Stem	Cob	Grain
	ZD958	W-V3	0.6	0.389841	0.14	1.34
		W-V3+R	0.677794	0.481168	0.140253	2.10674
		CK	0.62	0.486338	0.13	2.37
